# Supplementary material for: Role of Cation Structure in CO2 Separation by Ionic Liquid/Sulfonated Polyimide Composite Membrane
Source: PubMed Central journal article supplement (PMC6680971; doi:10.3390/membranes9070081), 2019-07-04
Supplement: membranes-09-00081-s001.pdf [file membranes-09-00081-s001.pdf]

# Supplementary Materials: Role of Cation Structure in CO<sub>2</sub> Separation by Ionic Liquid/Sulfonated Polyimide Composite Membrane

Eri Hayashi <sup>1</sup>, Kei Hashimoto <sup>1</sup>, Morgan L. Thomas <sup>1,§</sup>, Seiji Tsuzuki,<sup>2</sup> and Masayoshi Watanabe <sup>1,\*</sup>

<sup>1</sup> Department of Chemistry and Biotechnology, Yokohama National University, 79-5 Tokiwadai, Hodogaya-ku, Yokohama 240-8501, Japan

<sup>2</sup> Research Center for Computational Design of Advanced Functional Materials (CD-FMat), National Institute of Advanced Industrial Science and Technology (AIST), Tsukuba Central 2, 1-1-1 Umezono, Tsukuba, Ibaraki 305-8568, Japan

<sup>§</sup> Present address: Department of Materials and Life Sciences, Faculty of Science and Technology, Sophia University, 7-1 Kioicho, Chiyoda-ku, Tokyo 102-8554, Japan

\* Correspondence: mwatanab@ynu.ac.jp; Tel.: +81- 45-339-3955

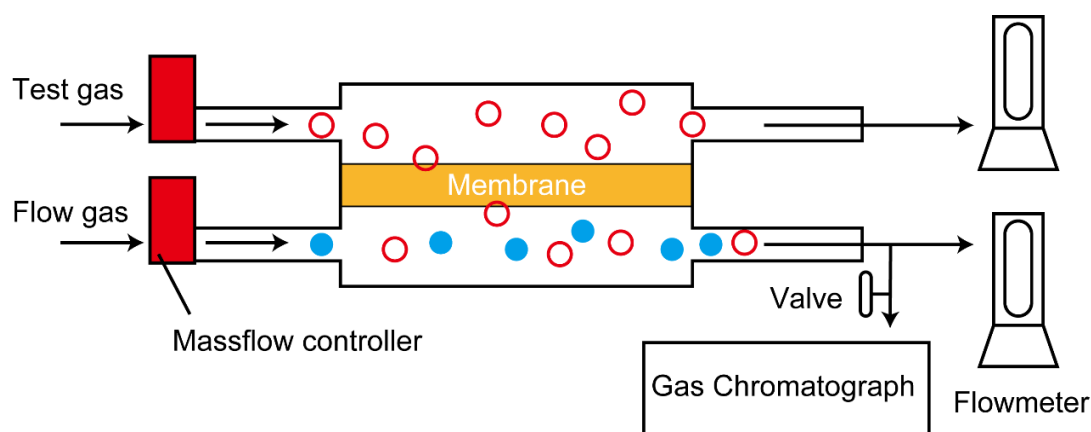

**Figure S1.** A sketch of gas permeation test.

**Table S1.** Decomposition temperatures of ion gels obtained by TG.

|                               | [C <sub>3</sub> imH][NTf <sub>2</sub> ] | [C <sub>2</sub> mim][NTf <sub>2</sub> ] |
|-------------------------------|-----------------------------------------|-----------------------------------------|
|                               | <i>T<sub>d</sub></i> / °C <sup>a</sup>  | <i>T<sub>d</sub></i> / °C <sup>a</sup>  |
| IL                            | 353.6                                   | 401.5                                   |
| IL/SPI composite <sup>b</sup> | 325.4                                   | 334.3                                   |
| SPI                           | 268.6                                   |                                         |

<sup>a</sup> Decomposition temperature (*T<sub>d</sub>*) is defined as the temperature at 5% weight loss.

<sup>b</sup> IL content of IL/SPI composite membrane is 75 wt%.

**Table S2.** Melting temperature (*T<sub>m</sub>*) and glass transition temperature (*T<sub>g</sub>*) for [C<sub>3</sub>imH][NTf<sub>2</sub>] and [C<sub>2</sub>mim][NTf<sub>2</sub>].

|                           | [C <sub>3</sub> imH][NTf <sub>2</sub> ] | [C <sub>2</sub> mim][NTf <sub>2</sub> ] <sup>a</sup> |
|---------------------------|-----------------------------------------|------------------------------------------------------|
| <i>T<sub>m</sub></i> / °C | 4.8                                     | -12.1, -2.7                                          |
| <i>T<sub>g</sub></i> / °C | -87.1                                   | -94.0                                                |

**Table S3** The results of gas permeability measurements performed under single gas conditions at 30 °C.<sup>a</sup>

|            | [C2mim][NTf2] | [C3imH][NTf2] |
|------------|---------------|---------------|
| $P_{CO_2}$ | 430           | 295           |
| $P_{N_2}$  | 13.7          | 11.4          |
| $\alpha$   | 31            | 26            |

<sup>a</sup> $P_{CO_2} / P_{N_2}$ . Unit of gas permeability coefficient ( $P$ ) is Barrer.

**Table S4.** CO<sub>2</sub> absorption properties of [C3imH][NTf2] at 30 °C.<sup>a</sup>

| $P$<br>(MPa) | $x_{CO_2}$ | $c_{CO_2}$<br>(mol/l) | $\rho^L$<br>(g/cm <sup>3</sup> ) | $\Delta V^L$<br>(%) |
|--------------|------------|-----------------------|----------------------------------|---------------------|
| 0            | 0          | 0                     | 1.49                             | 0                   |
| 0.66         | 0.15       | 0.65                  | 1.50                             | 1.16                |
| 1.36         | 0.26       | 1.32                  | 1.50                             | 2.97                |
| 1.86         | 0.33       | 1.82                  | 1.50                             | 4.68                |
| 2.16         | 0.37       | 2.13                  | 1.50                             | 5.88                |
| 2.67         | 0.43       | 2.67                  | 1.49                             | 8.21                |
| 3.42         | 0.50       | 3.44                  | 1.48                             | 12.35               |
| 3.99         | 0.55       | 4.04                  | 1.46                             | 15.98               |
| 4.53         | 0.59       | 4.53                  | 1.44                             | 19.91               |
| 5.03         | 0.62       | 4.93                  | 1.42                             | 23.90               |

<sup>a</sup>  $x_{CO_2}$ ,  $c_{CO_2}$ ,  $\rho^L$  and  $\Delta V^L$  correspond to the mole fraction of CO<sub>2</sub>, molarities of CO<sub>2</sub>, densities and volume expansions of the liquid phase, respectively, in the CO<sub>2</sub>/[C3mimH][NTf2] system.

**Table S5.** CO<sub>2</sub> absorption properties of [C2mim][NTf2] at 30 °C.<sup>a</sup>

| $P$<br>(MPa) | $x_{CO_2}$ | $c_{CO_2}$<br>(mol/l) | $\rho^L$<br>(g/cm <sup>3</sup> ) | $\Delta V^L$<br>(%) |
|--------------|------------|-----------------------|----------------------------------|---------------------|
| 0            | 0          | 0                     | 1.51                             | 0                   |
| 0.61         | 0.14       | 0.64                  | 1.52                             | 1.36                |
| 1.17         | 0.24       | 1.19                  | 1.52                             | 2.82                |
| 1.74         | 0.32       | 1.77                  | 1.52                             | 4.69                |
| 2.26         | 0.39       | 2.33                  | 1.52                             | 6.75                |
| 3.06         | 0.47       | 3.16                  | 1.50                             | 10.55               |
| 3.65         | 0.52       | 3.75                  | 1.49                             | 13.82               |
| 4.24         | 0.57       | 4.35                  | 1.48                             | 17.57               |
| 4.72         | 0.60       | 4.76                  | 1.46                             | 20.86               |
| 5.20         | 0.62       | 5.15                  | 1.44                             | 24.50               |

<sup>a</sup>  $x_{CO_2}$ ,  $c_{CO_2}$ ,  $\rho^L$  and  $\Delta V^L$  correspond to the mole fraction of CO<sub>2</sub>, molarities of CO<sub>2</sub>, densities and volume expansions of the liquid phase, respectively, in the CO<sub>2</sub>/[C2mim][NTf2] system.

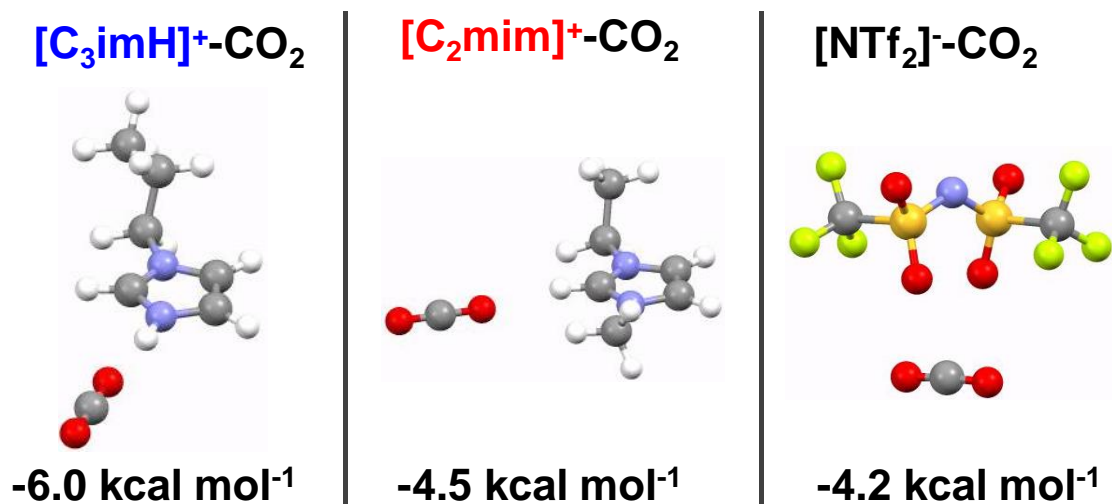

**Figure S2.** The most stable structures of  $[\text{C}_3\text{imH}]^+-\text{CO}_2$ ,  $[\text{C}_2\text{mim}]^+-\text{CO}_2$ , and  $[\text{NTf}_2]^- - \text{CO}_2$  complexes and their stabilization energies. Geometries were optimized at HF/6-311G\*\* level. Stabilization energies were calculated at MP2/6-311G\*\* level using the optimized geometries. Energy in kcal/mol.

**Table S6** The elastic modulus ( $E$ ), fracture stress ( $\sigma_f$ ), fracture strain ( $\lambda_f$ ), and fracture energy ( $W_f$ ) of IL/SPI membranes.

| IL <sup>a</sup> | $E$ (MPa) | $\sigma_f$ (MPa) | $\lambda_f$ (%) | $W_f$ (kJ/m <sup>3</sup> ) |
|-----------------|-----------|------------------|-----------------|----------------------------|
| AIL             | 3.1       | 6.3              | 194             | 7098                       |
| PIL             | 2.6       | 5.3              | 201             | 6004                       |

<sup>a</sup> AIL:[C<sub>2</sub>mim][NTf<sub>2</sub>]; PIL:[C<sub>3</sub>imH][NTf<sub>2</sub>] (IL content : 75 wt%).

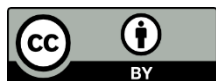

© 2019 by the authors. Submitted for possible open access publication under the terms and conditions of the Creative Commons Attribution (CC BY) license (<http://creativecommons.org/licenses/by/4.0/>).
